# Supplementary material for: In Vitro Anticancer Activity of Methanolic Extract of Justicia adhatoda Leaves with Special Emphasis on Human Breast Cancer Cell Line
Source: MDPI journal article supplement (doi:10.3390/molecules27238222), 2022-11-25
Supplement: s1 [file s1]

Supplementary file

**Supplementary Table S1:** List of phytochemicals obtained by LC-MS analysis of *J. adhatoda* methanolic extract.

| Sl no | Name                                    | Formula    | m/z      | RT    | Width | Height  | Area      |
|-------|-----------------------------------------|------------|----------|-------|-------|---------|-----------|
| 1     | Alpha d galactopyranose                 | C6H12O6    | 203.0512 | 3.69  | 0.26  | 25367   | 397353    |
| 2     | Vasicinol                               | C11H12N2O2 | 205.0966 | 5.35  | 0.26  | 608518  | 9994763   |
| 3     | Vasicine                                | C11H12N2O  | 189.1017 | 7.07  | 0.48  | 5392962 | 197106506 |
| 4     | Vasicinolone                            | C11H10N2O3 | 219.0759 | 8.59  | 0.29  | 420243  | 7716009   |
| 5     | Resveratrol 5 O-glucoside               | C20H22O8   | 391.1392 | 8.79  | 0.22  | 23854   | 323315    |
| 6     | Sinapine                                | C16H24NO5  | 311.1711 | 8.98  | 0.2   | 3520    | 29381     |
| 7     | Resveratrol 5 O-glucoside               | C20H22O8   | 391.1385 | 9.3   | 0.45  | 8531    | 197992    |
| 8     | Adhavasinsonone                         | C12H14N2O2 | 219.1122 | 9.34  | 0.32  | 1479562 | 29031855  |
| 9     | d-Viniferin                             | C28H22O6   | 455.1511 | 9.89  | 0.2   | 2624    | 27455     |
| 10    | Vasicol                                 | C11H14N2O2 | 207.1117 | 10.1  | 0.2   | 82013   | 1164407   |
| 11    | Dihydrocaffeic acid                     | C9H10O4    | 205.0486 | 10.23 | 0.21  | 15904   | 205464    |
| 12    | Ferulic acid                            | C10H10O4   | 195.0642 | 10.28 | 0.22  | 14893   | 201236    |
| 13    | Paniculide B                            | C15H20O5   | 281.1387 | 10.92 | 0.33  | 23889   | 411272    |
| 14    | Vasicinone                              | C11H10N2O2 | 203.0809 | 11.49 | 0.24  | 3692676 | 58709084  |
| 15    | Pinosylvin                              | C14H12O2   | 235.0701 | 12    | 0.25  | 5880    | 79402     |
| 16    | 5-methoxyvasicinone                     | C12H14N2O3 | 235.1067 | 12.26 | 0.33  | 7446    | 143398    |
| 17    | Skullcapflavone I                       | C17H14O6   | 337.0709 | 13.22 | 2.84  | 1552    | 10614     |
| 18    | Andrographidine C                       | C23H24O10  | 461.1443 | 14.24 | 0.27  | 4511    | 75925     |
| 19    | Deoxyvasicinone                         | C11H10N2O  | 187.0855 | 14.82 | 0.24  | 150137  | 2318336   |
| 20    | Andropanoside                           | C26H40O9   | 497.2717 | 15.13 | 0.54  | 1886    | 12211     |
| 21    | Ferulic acid                            | C10H10O4   | 195.0639 | 15.88 | 0.22  | 9536    | 130269    |
| 22    | d-Viniferin                             | C28H22O6   | 477.1379 | 16.05 | 0.26  | 5618    | 74795     |
| 23    | Andrographidine D                       | C25H28O12  | 477.1379 | 16.05 | 0.23  | 5061    | 74475     |
| 24    | Gardenin A                              | C21H22O9   | 419.134  | 17.38 | 0.25  | 2259    | 23320     |
| 25    | Andrographidine A                       | C23H26O10  | 463.1604 | 17.39 | 0.25  | 11749   | 185201    |
| 26    | 14-Deoxy-11-hydroxyandrographolide      | C20H30O5   | 351.2128 | 17.4  | 0.5   | 2465    | 14134     |
| 27    | 3,14-Dideoxyandrographolide             | C20H30O3   | 319.2258 | 18.16 | 0.23  | 1830    | 15684     |
| 28    | Deoxyandrographiside                    | C26H40O8   | 481.2784 | 18.18 | 0.22  | 10075   | 140837    |
| 29    | 19-O-acetylanhydroandrographolide       | C24H34O7   | 457.2212 | 18.32 | 0.17  | 3406    | 18481     |
| 30    | Andropaniculosin A                      | C18H16O7   | 345.097  | 19.02 | 0.28  | 2839    | 38387     |
| 31    | Homoveratric acid                       | C10H12O4   | 194.1509 | 19.78 | 0.18  | 4182    | 49807     |
| 32    | 12-Hydroxyandrographolide               | C19H28O7   | 391.1752 | 20.25 | 0.23  | 29753   | 425541    |
| 33    | 14-Deoxy-11-hydroxyandrographolide      | C20H30O5   | 351.2129 | 20.54 | 0.53  | 21040   | 603543    |
| 34    | Methoxyphenylacetic acid                | C9H10O3    | 167.0693 | 20.73 | 0.4   | 7156    | 128553    |
| 35    | 5-hydroxy-7,8,4'-trimethoxyflavone      | C18H16O6   | 329.1018 | 20.93 | 0.27  | 5444    | 99737     |
| 36    | 5-Hydroxy-7,8,2',3'-tetramethoxyflavone | C19H18O7   | 359.1127 | 21.25 | 0.26  | 18156   | 350292    |
| 37    | 8,17-Epoxy-14-deoxyandrographolide      | C20H30O5   | 353.2286 | 21.61 | 0.3   | 25543   | 478869    |
| 38    | Isoswertisin                            | C22H22O10  | 447.1284 | 22.72 | 0.33  | 2753    | 46492     |
| 39    | Andrographidine C                       | C23H24O10  | 461.1437 | 22.75 | 8.3   | 1379    | 11271     |
| 40    | Andrographolactone                      | C20H24O2   | 297.1831 | 23    | 0.16  | 5444    | 57374     |
| 41    | Stigmastanol ferulate                   | C39H60O4   | 615.4297 | 23.49 | 0.51  | 5781    | 161224    |
| 42    | 5-Hydroxy-7,8,2',3'-tetramethoxyflavone | C19H18O7   | 359.1115 | 23.68 | 1.38  | 1004    | 11710     |
| 43    | 14-deoxy-11,12-didehydroandrographolide | C20H28O4   | 333.2021 | 23.93 | 0.22  | 19265   | 258614    |
| 44    | 14-deoxy-11,12-didehydroandrographolide | C20H28O4   | 355.1868 | 25.87 | 0.2   | 5937    | 67107     |
| 45    | Adipic acid                             | C6H10O4    | 147.0636 | 26.18 | 0.19  | 3023    | 31977     |
| 46    | Andrographic Acid                       | C20H28O6   | 387.1786 | 26.87 | 0.17  | 7561    | 74839     |
| 47    | Piceatannol                             | C14H12O4   | 245.077  | 27.21 | 0.23  | 110784  | 1869280   |
| 48    | Tocopherol                              | C29H50O2   | 453.3666 | 27.37 | 0.26  | 6114    | 80583     |
| 49    | 14-acetylandrographolide                | C22H32O6   | 415.2097 | 27.39 | 0.2   | 21115   | 294302    |
| 50    | tetradecanoic acid/ Myristic acid       | C14H28O2   | 251.1979 | 27.75 | 0.23  | 5296    | 27296     |
| 51    | Vasnetine                               | C19H17N3O3 | 336.1328 | 27.87 | 0.21  | 257935  | 3489968   |
| 52    | 4-Hydroxyphenylacetic acid              | C8H8O3     | 153.0535 | 27.88 | 0.23  | 19601   | 262864    |

|    |                                                                                         |                                                               |          |       |       |         |          |
|----|-----------------------------------------------------------------------------------------|---------------------------------------------------------------|----------|-------|-------|---------|----------|
| 53 | <b>5-Hydroxy-7,8,2',5'-tetramethoxyflavone-5-O-<math>\beta</math>-D-glucopyranoside</b> | C <sub>25</sub> H <sub>28</sub> O <sub>12</sub>               | 543.1479 | 28.1  | 0.19  | 3240    | 28007    |
| 54 | <b>14-deoxy-11,12-didehydroandrographolide</b>                                          | C <sub>20</sub> H <sub>28</sub> O <sub>4</sub>                | 333.2017 | 28.28 | 0.2   | 4440    | 42215    |
| 55 | <b>8,17-Epoxy-14-deoxyandrographolide</b>                                               | C <sub>20</sub> H <sub>30</sub> O <sub>5</sub>                | 375.21   | 28.44 | 0.18  | 2403    | 16696    |
| 56 | <b>Paniculide C</b>                                                                     | C <sub>15</sub> H <sub>18</sub> O <sub>5</sub>                | 279.1205 | 28.69 | 0.2   | 2248    | 18200    |
| 57 | <b>tetradecanoic acid/ Myristic acid</b>                                                | C <sub>14</sub> H <sub>28</sub> O <sub>2</sub>                | 251.1991 | 29.31 | 0.18  | 7730    | 83687    |
| 58 | <b>14-deoxy-14,15-dehydroandrographolide</b>                                            | C <sub>20</sub> H <sub>28</sub> O <sub>5</sub>                | 319.1865 | 29.34 | 0.18  | 10598   | 115180   |
| 59 | <b>3-O-beta-D-glucopyranosyl-andrographolide</b>                                        | C <sub>26</sub> H <sub>40</sub> O <sub>10</sub>               | 535.2561 | 30.28 | 0.19  | 18200   | 223783   |
| 60 | <b>Dehydroandrographoline</b>                                                           | C <sub>20</sub> H <sub>28</sub> O <sub>5</sub>                | 349.1968 | 30.4  | 0.2   | 26773   | 347701   |
| 61 | <b>Methoxyphenylacetic acid</b>                                                         | C <sub>9</sub> H <sub>10</sub> O <sub>3</sub>                 | 167.0691 | 30.41 | 0.24  | 35228   | 578309   |
| 62 | <b>5,7,8-Trimethoxydihydroflavone</b>                                                   | C <sub>18</sub> H <sub>18</sub> O <sub>5</sub>                | 337.102  | 30.94 | 0.17  | 4596    | 45821    |
| 63 | <b>Cinnamic acid</b>                                                                    | C <sub>9</sub> H <sub>8</sub> O <sub>2</sub>                  | 149.0584 | 30.94 | 0.19  | 5718    | 55195    |
| 64 | <b>Resveratrol</b>                                                                      | C <sub>14</sub> H <sub>12</sub> O <sub>3</sub>                | 229.0857 | 31.3  | 19.58 | 1544    | 15456    |
| 65 | <b>Andrographolic acid</b>                                                              | C <sub>20</sub> H <sub>32</sub> O <sub>6</sub>                | 391.2134 | 31.46 | 0.16  | 15030   | 145413   |
| 66 | <b>Palmitic acid</b>                                                                    | C <sub>16</sub> H <sub>32</sub> O <sub>2</sub>                | 279.23   | 31.63 | 0.12  | 27229   | 229798   |
| 67 | <b>1,2-Dihydroxy-6,8-dimethoxyxanthone</b>                                              | C <sub>15</sub> H <sub>12</sub> O <sub>6</sub>                | 311.0542 | 32.33 | 0.25  | 3487    | 47362    |
| 68 | <b>alpha-Linolenic acid</b>                                                             | C <sub>18</sub> H <sub>30</sub> O <sub>2</sub>                | 279.2312 | 33.09 | 0.23  | 1047003 | 15455407 |
| 69 | <b>Stigmasta-5,22-dien-3-ol</b>                                                         | C <sub>29</sub> H <sub>48</sub> O                             | 413.3729 | 33.26 | 0.46  | 11126   | 241485   |
| 70 | <b>Monostearin</b>                                                                      | C <sub>21</sub> H <sub>42</sub> O <sub>4</sub>                | 359.3148 | 33.93 | 0.2   | 14164   | 168599   |
| 71 | <b>Paniculide A</b>                                                                     | C <sub>15</sub> H <sub>20</sub> O <sub>4</sub>                | 265.1428 | 34.11 | 0.2   | 5168    | 52919    |
| 72 | <b>6'-Acetylneoandrographolide</b>                                                      | C <sub>28</sub> H <sub>44</sub> O <sub>8</sub>                | 531.2918 | 34.37 | 0.18  | 7960    | 86793    |
| 73 | <b>Deoxyandrographolide</b>                                                             | C <sub>20</sub> H <sub>30</sub> O <sub>4</sub>                | 335.2174 | 35.34 | 1.09  | 2977    | 26605    |
| 74 | <b>Sitosterol</b>                                                                       | C <sub>29</sub> H <sub>50</sub> O                             | 437.3724 | 35.61 | 0.38  | 28350   | 646711   |
| 75 | <b>Octadecanoic acid</b>                                                                | C <sub>18</sub> H <sub>36</sub> O <sub>2</sub>                | 307.2616 | 36.14 | 0.17  | 3911    | 34236    |
| 76 | <b>3-Oxo-14-deoxy-11, 12-didehydroandrographolide</b>                                   | C <sub>31</sub> H <sub>39</sub> N <sub>3</sub> O <sub>6</sub> | 329.2095 | 37.85 | 0.2   | 3342    | 30789    |
| 77 | <b>14-Deoxyandrographolide</b>                                                          | C <sub>20</sub> H <sub>30</sub> O <sub>4</sub>                | 337.1992 | 38.25 | 0.14  | 3795    | 30473    |
| 78 | <b>Monostearin</b>                                                                      | C <sub>21</sub> H <sub>42</sub> O <sub>4</sub>                | 359.314  | 38.32 | 0.15  | 7642    | 69569    |
| 79 | <b>Phytol</b>                                                                           | C <sub>20</sub> H <sub>40</sub> O                             | 319.2977 | 39.87 | 0.2   | 5333    | 70295    |
| 80 | <b>Deoxyandrographolide</b>                                                             | C <sub>20</sub> H <sub>30</sub> O <sub>4</sub>                | 357.2015 | 41.34 | 0.18  | 2786    | 19677    |
| 81 | <b>Tocopherol</b>                                                                       | C <sub>29</sub> H <sub>50</sub> O <sub>2</sub>                | 431.3869 | 44.09 | 1.18  | 1808    | 10739    |

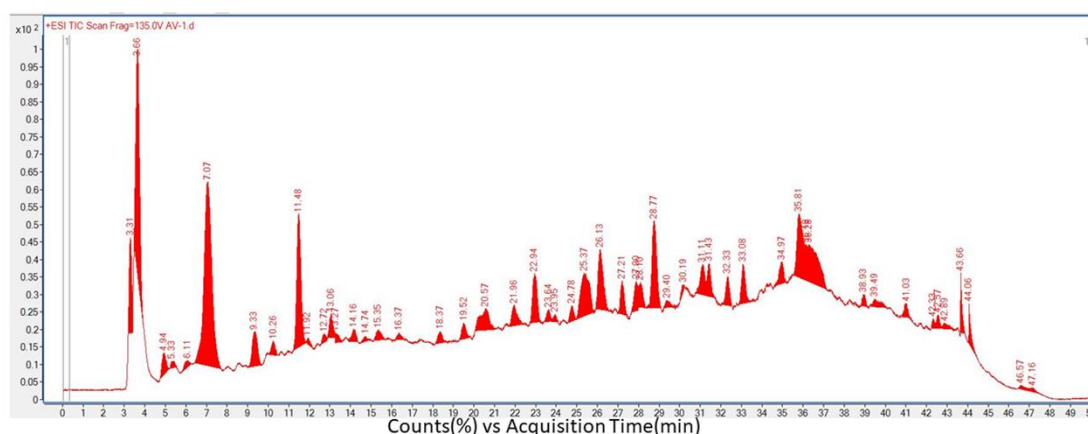

**Supplementary Figure S1- LCMS *Justicia adhatoda* leaf extract.** The chromatogram was obtained by Q-TOF-LCMS analysis of *Justicia adhatoda* leaf extract to determine its phytoconstituents.

FIGURE 3

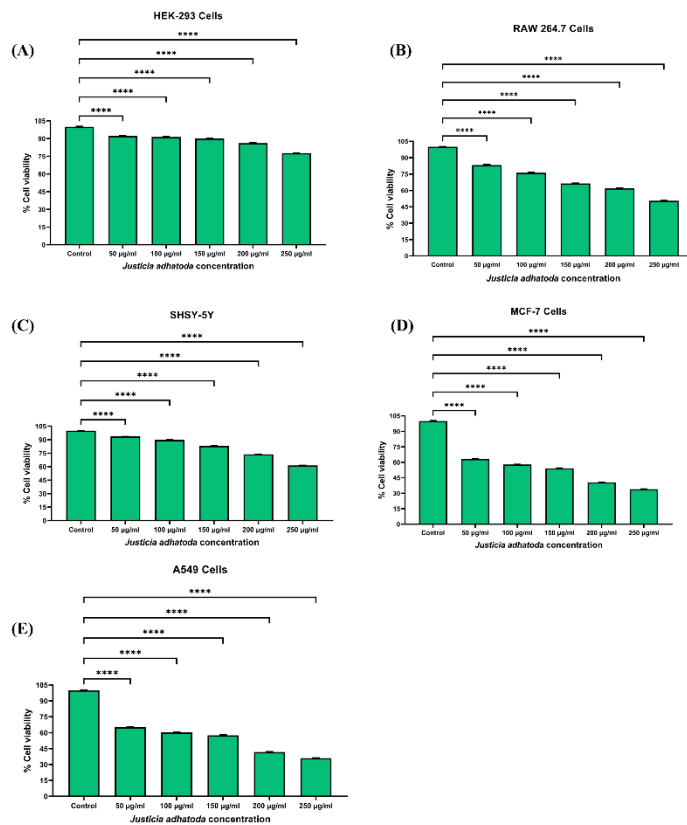Supplementary Figure S2- MTT assay of *J. adhatoda* leaf extract in different cell lines.**Supplementary Table S2:** The gradient of the mobile phase for chromatographic separation

| Time(min) | Acetonitrile (%) | Methanol (%) | 0.5% acetic acid in water (%) |
|-----------|------------------|--------------|-------------------------------|
| 0-30      | 12-25            | 0            | 88-75                         |
| 30-45     | 25-23.5          | 0-11         | 75-65.5                       |
| 45-68     | 23.5-35          | 11-4         | 65.5-61                       |
| 68-85     | 35               | 4            | 61                            |
| 85-90     | 35-50            | 4-0          | 61-50                         |
| 90-95     | 100              | 0            | 0                             |
| 95-100    | 100              | 0            | 0                             |
